# Supplementary material for: Validation study on the assay method for anti-factor IIa potency of enoxaparin sodium
Source: PeerJ. 2024 Dec 18;12:e18732. doi: 10.7717/peerj.18732 (PMC11662901; doi:10.7717/peerj.18732)
Supplement: Supplemental Information 1 [file peerj-12-18732-s001.xlsx]

## Sheet: Sheet1
Supplemental Table: Absorbance values measured for each solution
ID		S1	S2	S3	S4	T1	T2	T3	T4	T1	T2	T3	T4	S1	S2	S3	S4
Robustness	P0(Initial)	0.3045	0.4196	0.5492	0.6983	0.3027	0.4002	0.4941	0.632	0.3075	0.4006	0.5072	0.6366	0.323	0.4351	0.5683	0.6985
	P1（+15sec）	0.3216	0.4505	0.5709	0.7383	0.2984	0.4151	0.5215	0.6651	0.307	0.4239	0.5359	0.6654	0.3438	0.4618	0.5972	0.739
	P4（-15sec）	0.2908	0.4034	0.5389	0.6996	0.2801	0.3643	0.4841	0.6142	0.2764	0.3639	0.489	0.619	0.2908	0.4146	0.543	0.6926
	P2（+2℃）	0.3052	0.4182	0.5567	0.7136	0.2789	0.377	0.4968	0.6301	0.2782	0.3876	0.495	0.6239	0.3007	0.4305	0.5509	0.6825
	P3（-2℃）	0.2908	0.4034	0.5389	0.6996	0.2801	0.3643	0.4841	0.6142	0.2764	0.3639	0.489	0.619	0.2908	0.4146	0.543	0.6926
	P0hr	0.4164	0.5076	0.6409	0.7782	0.4335	0.5301	0.6415	0.7721	0.4652	0.5199	0.634	0.7755	0.4609	0.5135	0.6839	0.7939
	P24hr	0.3022	0.4098	0.5403	0.6676	0.3332	0.4156	0.5175	0.653	0.3296	0.4191	0.5353	0.6615	0.3226	0.4225	0.5508	0.671
Repeatability	Re1	0.3135	0.4298	0.485	0.6516	0.3394	0.3821	0.5215	0.617	0.344	0.3765	0.501	0.5927	0.2959	0.4144	0.4825	0.6229
	Re2	0.322	0.4145	0.5925	0.763	0.3583	0.4586	0.5535	0.7556	0.3806	0.5164	0.5764	0.7139	0.381	0.4954	0.5654	0.7267
	Re3	0.3151	0.466	0.6167	0.768	0.3282	0.4719	0.5997	0.7372	0.3291	0.4781	0.5961	0.7731	0.3112	0.4643	0.5681	0.7399
	Re4	0.3118	0.4734	0.5982	0.7599	0.3239	0.4778	0.5925	0.7445	0.3207	0.4722	0.5888	0.7514	0.3064	0.4717	0.5812	0.7591
	Re5	0.3227	0.4247	0.5956	0.7649	0.3519	0.4435	0.5847	0.7523	0.3203	0.4615	0.5686	0.7466	0.3102	0.4731	0.5718	0.7515
	Re6	0.3325	0.4576	0.6003	0.7516	0.3479	0.4573	0.5543	0.7008	0.3435	0.4463	0.5677	0.6804	0.3334	0.4329	0.5556	0.6868
Intermediate Precision	Re1	0.2964	0.4117	0.5185	0.69	0.3116	0.4043	0.5406	0.6691	0.301	0.4179	0.5323	0.6699	0.2817	0.395	0.4905	0.6585
	Re2	0.2828	0.3894	0.4921	0.6557	0.2981	0.403	0.5153	0.6741	0.3003	0.4089	0.5201	0.6972	0.2895	0.4192	0.5055	0.6754
	Re3	0.2773	0.39	0.5209	0.7187	0.3045	0.3984	0.51	0.698	0.2884	0.3938	0.5094	0.6566	0.2863	0.3796	0.5172	0.7046
	Re4	0.2642	0.3675	0.3887	0.6317	0.2708	0.3673	0.5075	0.6451	0.2722	0.3239	0.494	0.5895	0.2753	0.3788	0.4141	0.6715
	Re5	0.3339	0.4326	0.5874	0.6953	0.347	0.464	0.598	0.7235	0.3394	0.4594	0.5962	0.7357	0.3295	0.4533	0.5997	0.7517
	Re6	0.3584	0.363	0.5277	0.667	0.3215	0.3964	0.5339	0.6748	0.3185	0.3935	0.5349	0.6889	0.2945	0.3551	0.5194	0.6999
Accuracy	SP1 (Initial Sample 1)	0.3022	0.4098	0.5403	0.6676	0.3332	0.4156	0.5175	0.653	0.3296	0.4191	0.5353	0.6615	0.3226	0.4225	0.5508	0.671
	PB1 (Spiking 1)	0.2903	0.4365	0.5748	0.7404	0.3056	0.4369	0.5701	0.7329	0.2995	0.4209	0.5601	0.713	0.2961	0.4356	0.5667	0.7297
	PB2 (Spiking 2)	0.2805	0.3791	0.4797	0.6169	0.2826	0.3946	0.4845	0.6324	0.3004	0.3692	0.4906	0.6546	0.2953	0.382	0.5431	0.6576
	PB3 (Spiking 3)	0.3016	0.4178	0.5236	0.6665	0.3032	0.4126	0.4922	0.6569	0.3051	0.435	0.5562	0.696	0.299	0.4188	0.5461	0.6939
	PB4 (Spiking 4)	0.2853	0.3919	0.5228	0.6584	0.2977	0.3871	0.5099	0.6418	0.3069	0.3835	0.5085	0.6502	0.2885	0.3977	0.5287	0.6768
	PB5 (Spiking 5)	0.2676	0.3631	0.4921	0.6333	0.2789	0.3671	0.4988	0.6243	0.2866	0.3804	0.5081	0.6798	0.2901	0.4392	0.5243	0.6738
	SP2 (Initial Sample 2)	0.2941	0.4189	0.5666	0.7465	0.3036	0.4335	0.562	0.7391	0.2911	0.4315	0.5762	0.744	0.2902	0.4197	0.5281	0.7333
	PB6 (Spiking 6)	0.3024	0.433	0.5995	0.7655	0.2999	0.4253	0.6228	0.7505	0.2962	0.4205	0.6137	0.7458	0.3008	0.4344	0.5943	0.7639
Control Tests	Re1	0.243	0.454	0.792	1.044	0.257	0.461	0.773	1.055	0.223	0.496	0.831	1.071	0.257	0.493	0.835	1.073
	Re2	0.228	0.504	0.816	1.079	0.235	0.488	0.809	1.068	0.227	0.509	0.843	1.081	0.274	0.535	0.819	1.072
	Re3	0.238	0.475	0.8	1.071	0.258	0.486	0.79	1.071	0.229	0.51	0.831	1.091	0.239	0.511	0.847	1.067
	Re4	0.228	0.465	0.78	1.095	0.237	0.465	0.795	1.089	0.229	0.448	0.815	1.092	0.267	0.453	0.867	1.049
	Re5	0.253	0.445	0.804	1.09	0.24	0.473	0.817	1.089	0.256	0.489	0.803	1.079	0.278	0.479	0.866	1.028
	Re6	0.231	0.468	0.819	1.066	0.211	0.477	0.779	1.053	0.203	0.482	0.768	1.021	0.254	0.494	0.855	1.059
